# Supplementary material
Source: Springer Nature journal article supplement (https://www.springermedizin.de/resource/supplementary/12936_2007_491_MOESM1_ESM.pdf/9547872)
Supplement: MOESM1 [file 9547872]

Patients included N=316

Patients excluded N = 0

Safety population N = 316

One intake N = 161

Two intakes N = 155

Patients excluded N = 2\*

ITT population N= 314

(99.4%)

One intake N = 159

Two intakes N = 155

Patients excluded

N = 16\*\*

PP population N= 298

(94.3%)

One intake N = 148

Two intakes N = 150
